# Supplementary material for: CPT Changes and Their Effects on Billing in an Outpatient Clinic
Source: Atypon-hosted journal article supplement (doi:10.1176/appi.ps.201400137), 2015-02-01
Supplement: appi.ps.201400137.ds001.pdf [file appi.ps.201400137.ds001.pdf]

| Group     | Number of subjects | Mean RVU/visit Nov-2012 | Mean RVU/visit Feb-2013 | Mean RVU/Visit June-2013 |
|-----------|--------------------|-------------------------|-------------------------|--------------------------|
| AT        | 25                 | 1.66                    | 2.13                    | 2.15                     |
| NP        | 8                  | 1.55                    | 2.06                    | 2.31                     |
| R/F       | 27                 | 1.82                    | 1.96                    | 1.74                     |
| All Staff | 60                 | 1.71                    | 2.04                    | 2.00                     |

Table: Average RVU/visit for each group of clinicians during the three time points of Nov-2012, Feb-2013, and June-2013. AT: attending psychiatrists, NP: nurse practitioners, R/F: PGY-3 and PGY-4 residents and fellows working in the outpatient clinic.
